# Supplementary material for: Demand for community-based care services and its influencing factors among the elderly in affordable housing communities: a case study in Nanjing City
Source: PubMed Central journal article supplement (PMC7092588; doi:10.1186/s12913-020-5067-0), 2020-03-23
Supplement: 12913_2020_5067_MOESM2_ESM.pdf [file 12913_2020_5067_MOESM2_ESM.pdf]

**Table S1 Logistic regression results of the main demands for community-based care services (with confidence intervals)**

| Variables                                         | Y <sub>1</sub>     | Y <sub>2</sub>       | Y <sub>3</sub>        | Y <sub>4</sub>      | Y <sub>5</sub>        |
|---------------------------------------------------|--------------------|----------------------|-----------------------|---------------------|-----------------------|
|                                                   | OR (95% CI)        | OR (95% CI)          | OR (95% CI)           | OR (95% CI)         | OR (95% CI)           |
| <b>Sociodemographic characteristics</b>           |                    |                      |                       |                     |                       |
| Gender(Male)                                      | 1.308(0.760-2.249) | 0.577(0.316-1.055)   | 1.230(0.699-2.167)    | 0.396(0.175-0.894)* | 1.224(0.714-2.098)    |
| Educational level                                 | 1.116(0.848-1.470) | 1.327(0.976-1.805)   | 1.391(1.052-1.840)*   | 1.068(0.712-1.603)  | 1.004(0.779-1.292)    |
| Health status                                     | 1.141(0.765-1.701) | 1.257(0.813-1.945)   | 0.545(0.361-0.824)**  | 0.918(0.495-1.701)  | 2.545(1.686-3.841)*** |
| Self-care ability                                 | 0.710(0.441-1.143) | 0.415(0.227-0.759)** | 0.643(0.396-1.044)    | 0.488(0.193-1.230)  | 0.912(0.589-1.413)    |
| Career (other)                                    | 1.000              | 1.000                | 1.000                 | 1.000               | 1.000                 |
| Daily laborer                                     | 0.381(0.117-1.240) | 0.518(0.126-2.121)   | 0.167(0.044-0.640)**  | 0.762(0.163-3.563)  | 1.126(0.359-3.534)    |
| Public institution employee                       | 0.445(0.091-2.164) | 0.599(0.102-3.522)   | 0.098(0.020-0.479)**  | 0.580(0.060-5.560)  | 0.327(0.077-1.389)    |
| State-owned company employee                      | 0.387(0.113-1.333) | 0.372(0.093-1.494)   | 0.170(0.044-0.663)*   | 0.320(0.057-1.792)  | 0.243(0.073-0.814)*   |
| Private company employee                          | 0.775(0.209-2.869) | 0.946(0.196-4.571)   | 0.075(0.018-0.316)*** | 0.619(0.100-3.850)  | 0.487(0.141-1.684)    |
| <b>Family structure</b>                           |                    |                      |                       |                     |                       |
| Living status (Three generations living together) | 1.000              | 1.000                | 1.000                 | 1.000               | 1.000                 |

|                                                          |                       |                       |                       |                      |                     |
|----------------------------------------------------------|-----------------------|-----------------------|-----------------------|----------------------|---------------------|
| With spouse                                              | 2.701(1.028-7.098)*   | 0.722(0.263-1.980)    | 0.322(0.122-0.848)*   | 2.297(0.739-7.135)   | 3.221(1.318-7.872)* |
| With children                                            | 2.986(1.105-8.066)*   | 1.029(0.368-2.875)    | 0.695(0.259-1.860)    | 4.011(1.171-13.735)* | 3.349(1.306-8.586)* |
| <b>Economic characteristics</b>                          |                       |                       |                       |                      |                     |
| Economic source(other)                                   | 1.000                 | 1.000                 | 1.000                 | 1.000                | 1.000               |
| Retirement pension and endowment insurance               | 1.057(0.308-3.621)    | 6.030(1.593-22.825)** | 3.385(0.860-13.319)   | 8.878(1.477-53.371)* | 0.363(0.090-1.468)  |
| Money from children or relatives                         | 0.736(0.216-2.505)    | 8.729(2.263-33.665)** | 4.476(1.133-17.678)*  | 1.393(0.312-6.222)   | 0.338(0.085-1.341)  |
| Personal labor income                                    | 0.432(0.078-2.387)    | 2.074(0.346-12.425)   | 11.666(1.440-94.497)* | 4.061(0.422-39.078)  | 0.144(0.024-0.861)* |
| <b>Elderly care intention</b>                            |                       |                       |                       |                      |                     |
| Elderly care intention (Community-based care facilities) | 1.000                 | 1.000                 | 1.000                 | 1.000                | 1.000               |
| Private homes                                            | 0.255(0.134-0.483)*** | 0.408(0.195-0.853)*   | 0.648(0.360-1.169)    | 0.687(0.257-1.833)   | 1.114(0.625-1.987)  |
| Long-term care institution                               | 1.462(0.190-11.269)   | 0.032(0.003-0.339)**  | 0.194(0.020-1.878)    | 0.386(0.037-4.030)   | 0.377(0.053-2.667)  |
| Constant                                                 | 2.427                 | 0.000                 | 75.722*               | 10.360               | 0.074               |
| <b>The p value of Hosmer and Lemeshow Test</b>           | 0.098                 | 0.186                 | 0.276                 | 0.243                | 0.210               |
| <b>Percentage of correct prediction</b>                  | 68%                   | 77%                   | 71%                   | 84%                  | 71%                 |

Notes: 1. Y<sub>1</sub>: The elderly care hotline, Y<sub>2</sub>: Building health archives, Y<sub>3</sub>: On-call nursing and doctor visits, Y<sub>4</sub>: Regular medical examinations, Y<sub>5</sub>: Sporting fitness; 2. The category in parentheses for each variable is the reference group; 3. \*\*\* p<0.001, \*\* p<0.01, \* p<0.05.
